# Supplementary material for: Population-based mechanistic modeling allows for quantitative predictions of drug responses across cell types
Source: PubMed Central journal article supplement (PMC5825396; doi:10.1038/s41540-018-0047-2), 2018-02-24
Supplement: 41540_2018_47_MOESM1_ESM.pdf [file 41540_2018_47_MOESM1_ESM.pdf]

## SUPPLEMENTARY METHODS

### Predicted Residual Sum of Squares (PRESS)

PRESS represents a statistic describing lack of prediction accuracy<sup>1,2</sup>. Following cross-validation, a matrix  $\hat{\mathbf{y}}$  of out-of-sample predictions will be generated. Corresponding to the original  $\mathbf{Y}$  matrix, for each column PRESS can be computed respectively, as:

$$PRESS = \sum_{i=1}^n (\mathbf{Y}_i - \hat{\mathbf{y}}_i)^2$$

While Total Sum of Square (TSS) for each column is computed as:

$$TSS = \sum_{i=1}^n (\mathbf{Y}_i - \bar{\mathbf{Y}}_i)^2$$

\*  $\bar{\mathbf{Y}}_i$  stands for the column mean of the original  $\mathbf{Y}$  matrix

All the  $R^2$  values following cross-validation reported in the study were computed as

$$R^2 = 1 - \frac{PRESS}{TSS}$$

### Decision on number of components used in PLS regression

To leave out small components that only describe noise and avoid the problems of overfitting<sup>3,4</sup>, process for identifying the proper number of components to keep in PLS regression was implemented. In particular, we tested the number of components from 1 to the rank of the input matrix (e.g. the  $\mathbf{Y}_{\text{IPSC-CM}}$  in Fig. 2A); for every trial we computed the following statistics: 1)  $R^2$  values from model building; 2) PRESS for predicted error following leave-one-out cross validation. The proper number of components to use was then identified so that the minimal PRESS value and a high  $R^2$  value are achieved concomitantly.

**References**

- 1-Allen, D. M. The Relationship between Variable Selection and Data Augmentation and a Method for Prediction. *Technometrics* 16, 125-127 (1974).
- 2-Geladi, P. & Kowalski, B. R. Partial least-squares regression: a tutorial. *Analytica Chimica Acta* 185, 1-17 (1986).
- 3-Hawkins, D. M. The Problem of Overfitting. *Journal of Chemical Information and Computer Sciences* 44, 1-12 (2004).
- 4-Tetko, I. V., Livingstone, D. J. & Luik, A. I. Neural network studies. 1. Comparison of overfitting and overtraining. *Journal of Chemical Information and Computer Sciences* 35, 826-833 (1995).
