# Supplementary material for: Population-based mechanistic modeling allows for quantitative predictions of drug responses across cell types
Source: PubMed Central journal article supplement (PMC5825396; doi:10.1038/s41540-018-0047-2), 2018-02-24
Supplement: 41540_2018_47_MOESM2_ESM.pdf [file 41540_2018_47_MOESM2_ESM.pdf]

**SUPPLEMENTARY FIGURES**

| <b>Content in SI</b> | <b>Relevance</b>                                                                                 |
|----------------------|--------------------------------------------------------------------------------------------------|
| Fig. S1, Fig. S2     | Constructing and optimizing the cross-cell type regression model from iPSC-CMs to adult myocytes |
| Fig. S3              | Cross-cell type regression with guinea pig and rabbit ventricular myocyte models                 |
| Fig. S4              | Cross-cell type predictions of adult myocyte behavior from different mathematical models         |

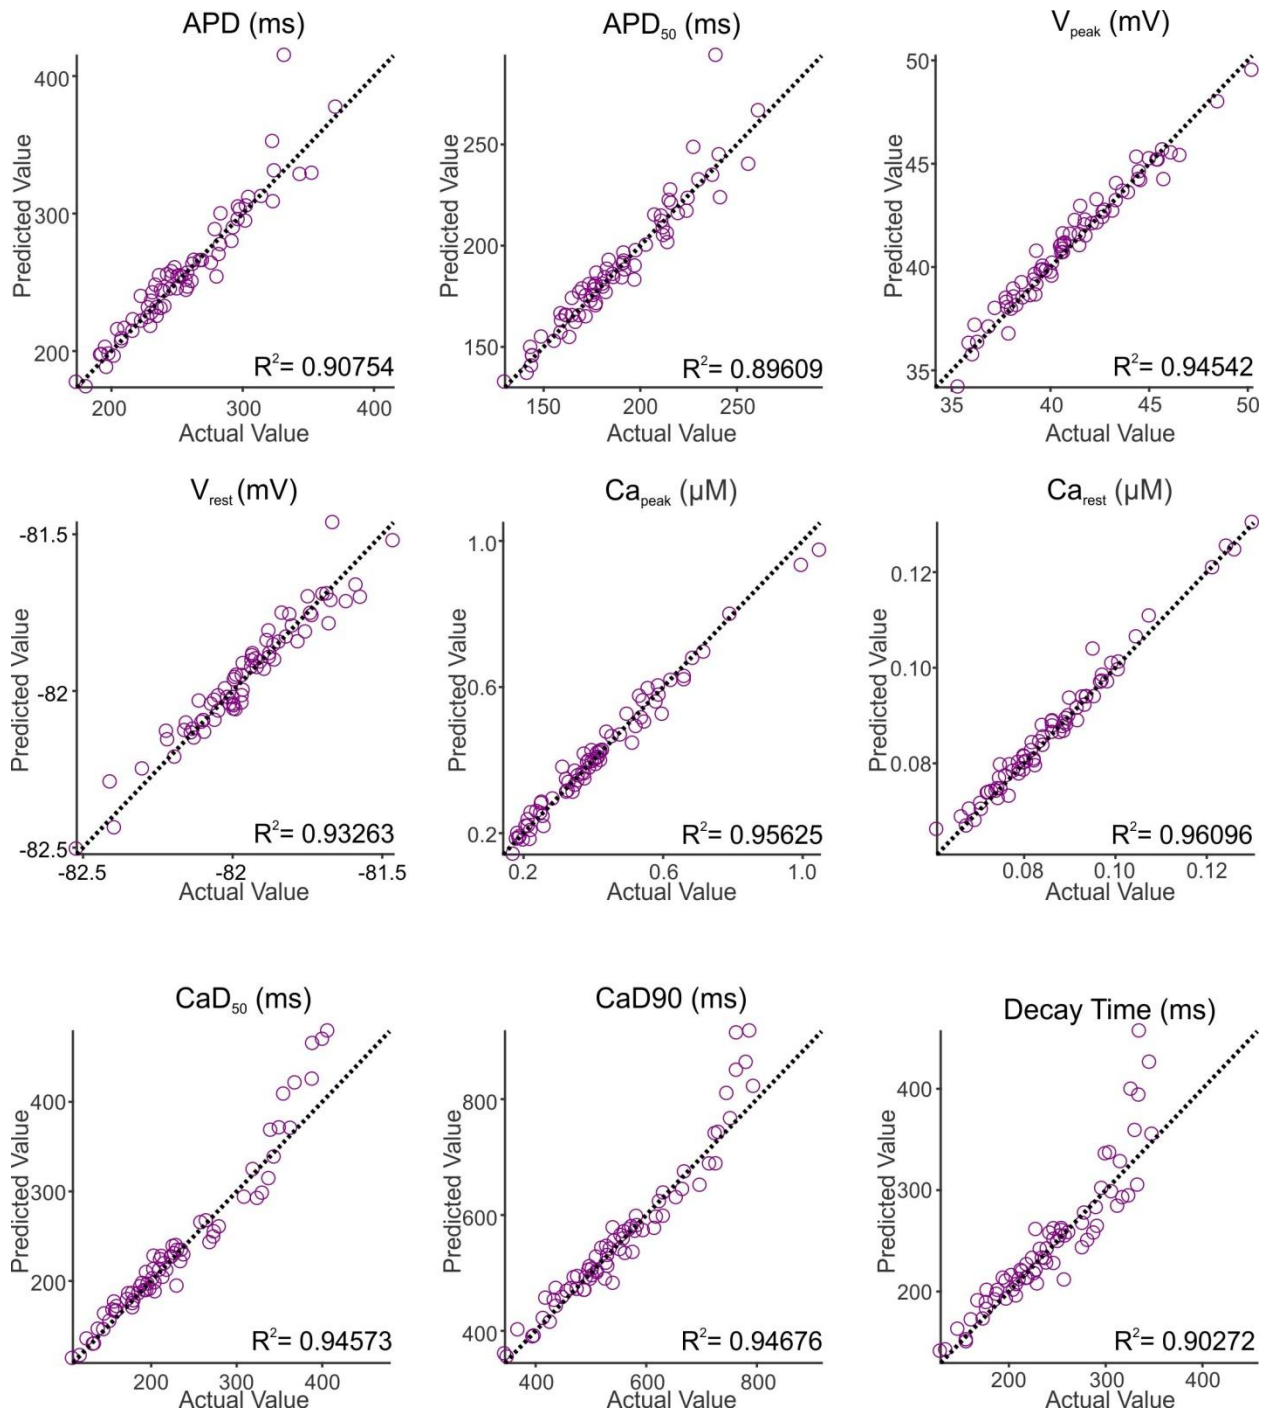

**Fig. S1.** Scatter plots for 9 additional physiological features (besides APD<sub>90</sub> and CaTA) quantified from AP and CaT that are simultaneously predicted by the cross-cell type regression model from iPSC-CM to adult myocyte. Actual values for each feature (*abscissa*) are plotted versus predicted values (*vertical*);  $R^2$  values were derived from five-fold cross validation. For clarity, only 100 cells are plotted although 600 cells in total were used to construct the cross-cell type regression model.

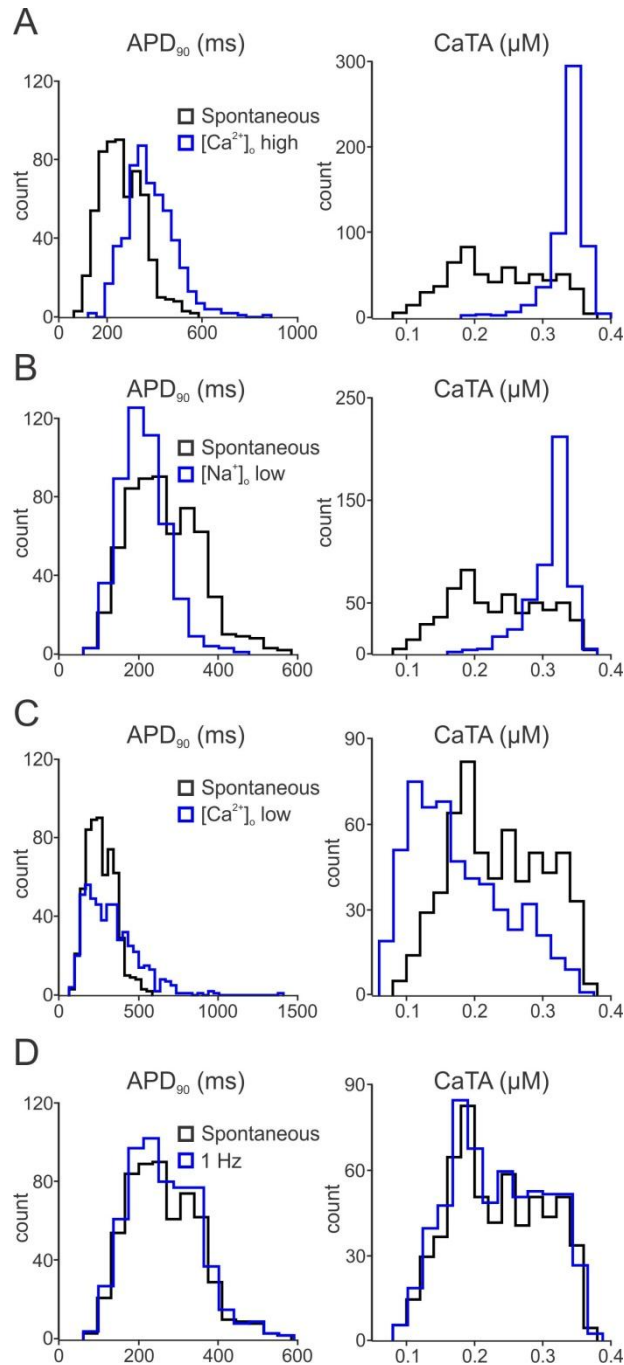

**Fig. S2.** Distribution of iPSC-CM population  $APD_{90}$  and CaTA of simulation results under different experimental conditions. In each plot, baseline spontaneous contraction histograms are plotted in black, and alternative experimental conditions are shown in blue. **(A)** increased extracellular  $Ca^{2+}$  (3.0 mM,  $[Ca^{2+}]_o$  high); **(B)** decreased extracellular  $Na^+$  (70 mM,  $[Na^+]_o$  low); **(C)** decreased extracellular  $Ca^{2+}$  (0.9 mM,  $[Ca^{2+}]_o$  low); **(D)** 1 Hz pacing (1 Hz). Note that larger shifts in  $APD_{90}$  and CaTA histograms are observed in **(A)** and **(B)** compared with **(C)** and **(D)**.

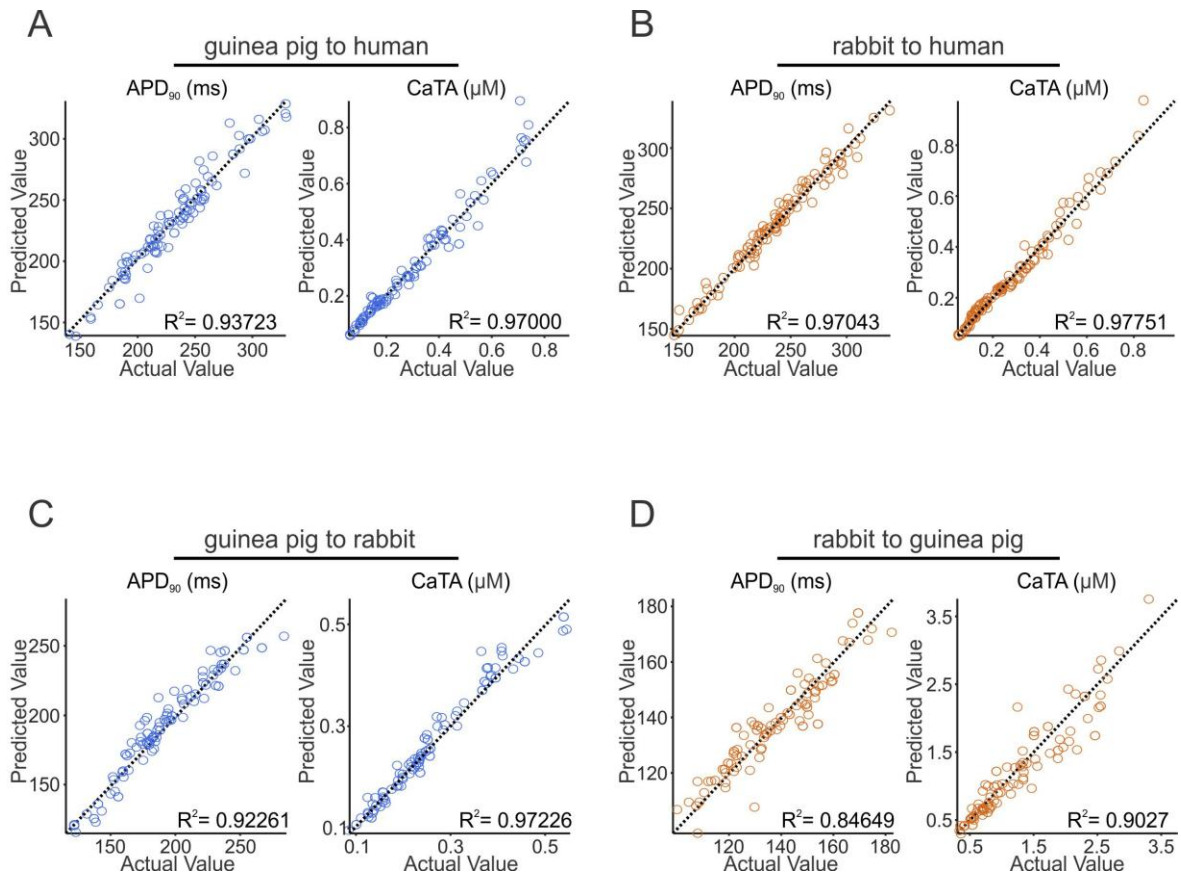

**Fig. S3.** Scatter plots demonstrating the predictive strength for four cross-cell type regression models: (1) guinea pig ventricular myocyte predicts human adult myocyte **(A)**; (2) rabbit ventricular myocyte predicts human adult myocyte **(B)**; (3) guinea pig ventricular myocyte predicts rabbit ventricular myocyte **(C)**; (4) rabbit ventricular myocyte predicts guinea pig ventricular myocyte **(D)**. APD<sub>90</sub> and CaTA results are shown; actual values for each feature (*abscissa*) are plotted versus predicted values (*ordinate*). R<sup>2</sup> values were calculated following five-fold cross validation for all four regression models. For clarity, only 100 cells were plotted but in total 600 cells were used to construct the cross-cell type regression models.

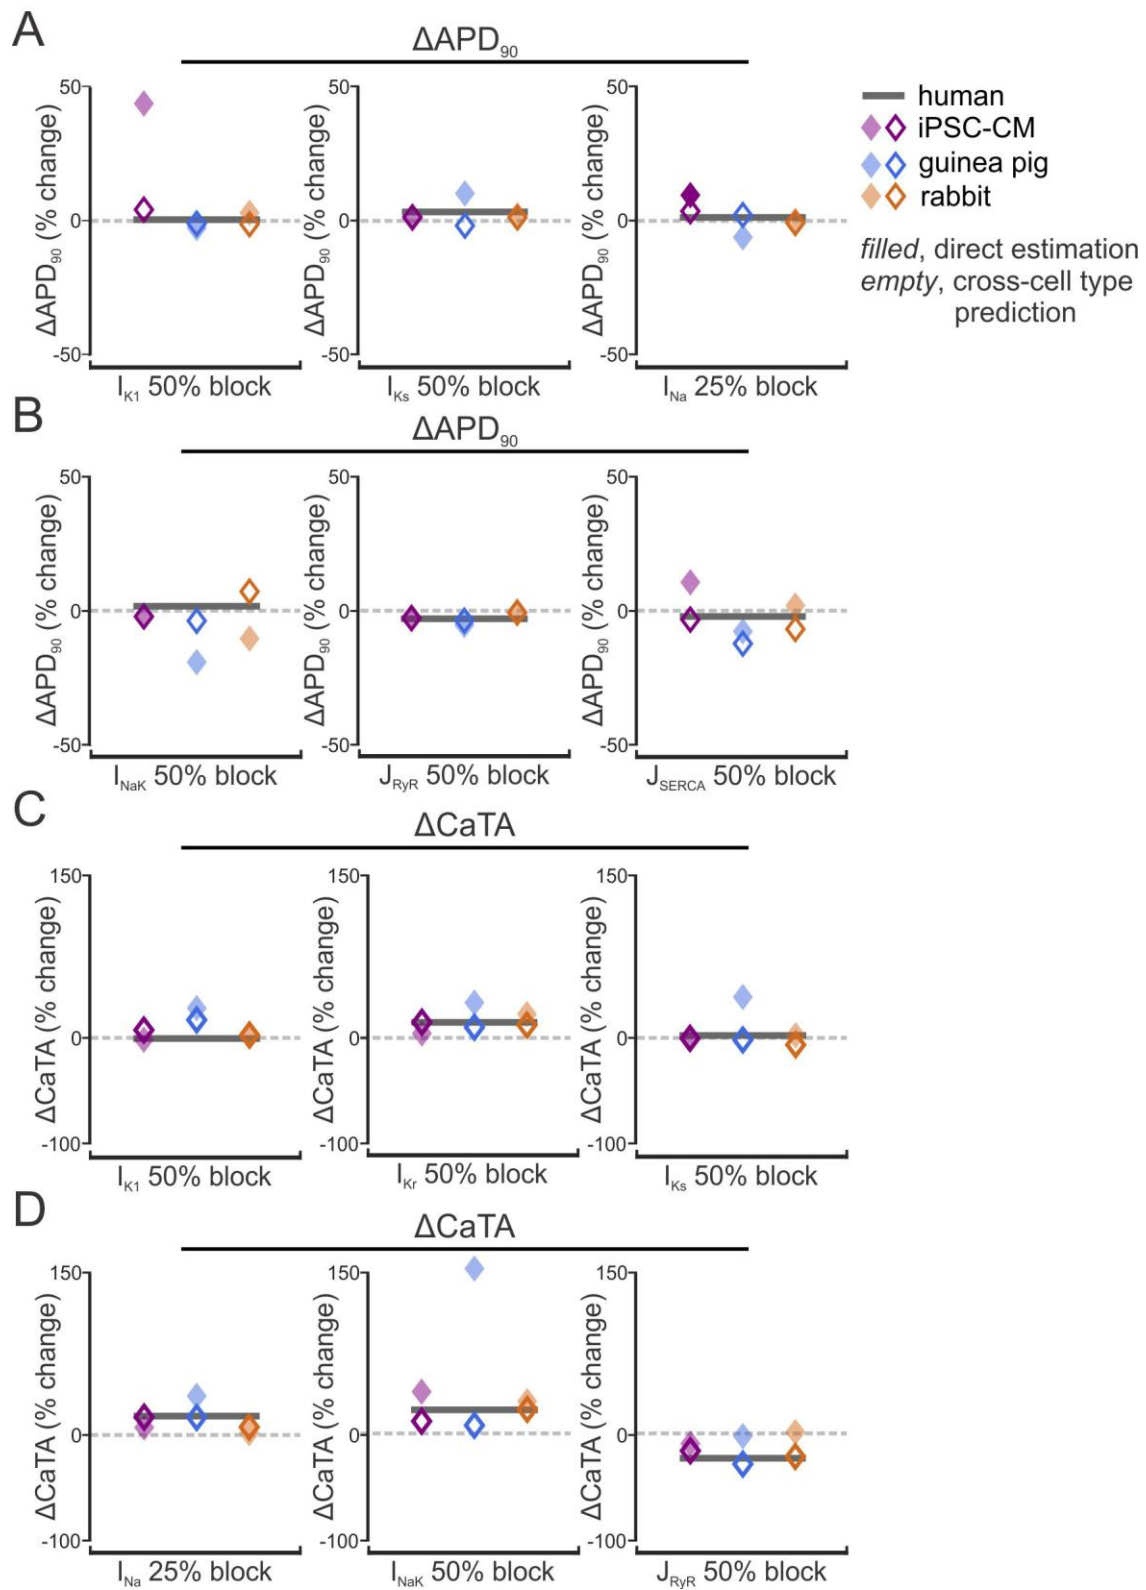

**Fig. S4.** Effects on  $APD_{90}$  and CaTA with simulated 50% block of ion transport pathways. Figure 6 shows the effects of blocking the three ion transport pathways that had the greatest influence on  $APD_{90}$  and CaTA. These results show the effects of blocking the remaining pathways. Simulated adult myocyte responses are plotted as dark grey bars; cross-cell type predictions originating from 3 alternative cell types are plotted as empty diamonds, and direct estimates from alternative cell type responses are plotted as filled diamonds. Consistent between iPSC-CM (purple), guinea pig ventricular myocyte (blue) and rabbit ventricular myocyte (orange) models, cross-cell type predictions achieved better accuracy in terms of capturing real adult myocyte responses. (For  $I_{Na}$ , 25% block results are shown because 50%  $I_{Na}$  blockade in the iPSC-CM model resulted in failure to initiate spontaneous action potentials).
